# Supplementary material for: Realization of an efficient electron source by ultraviolet-light-assisted field emission from a one-dimensional ZnO nanorods/n-GaN heterostructure photoconductive detector
Source: Royal Society of Chemistry journal article supplement (doi:10.1039/c8nr08154a), 2018-12-20
Supplement: c8nr08154a1.pdf [file c8nr08154a1.pdf]

## Supporting Information

### **Realization of an efficient electron source by ultraviolet-light-assisted field emission from a one-dimensional ZnO nanorods/n-GaN heterostructure photoconductive detector**

*Yiren Chen,<sup>a,†</sup> Zhiwei Zhang,<sup>a</sup> Hong Jiang,<sup>a</sup> Zhiming Li,<sup>a</sup> Guoqing Miao,<sup>a</sup> Hang Song,<sup>\*a</sup> Liqin Hu,*

*<sup>b,†</sup> and Tailing Guo<sup>\*b</sup>*

<sup>a</sup> State Key Laboratory of Luminescence and Applications, Changchun Institute of Optics, Fine Mechanics and Physics, Chinese Academy of Sciences, Changchun 130033, People's Republic of China

<sup>b</sup> College of Physics and Information Engineering, Fuzhou University, Fuzhou 350002, People's Republic of China

<sup>†</sup> These authors contributed equally.

#### **Corresponding Author**

\*E-mail: songh@ciomp.ac.cn

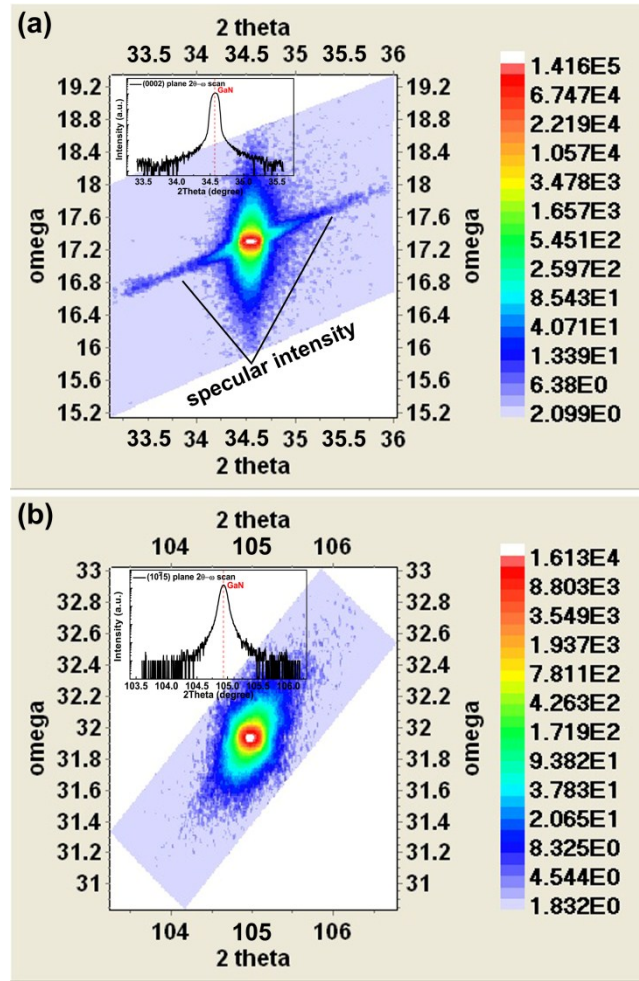

Fig. S1. Reciprocal space mapping (RSM) obtained by a high-resolution X-ray diffractometer. (a) The symmetrical RSM around the (0002) reflection for as-fabricated n-GaN epilayer. The inset shows its corresponding  $2\theta$ - $\omega$  scanning curve. (b) The asymmetrical RSM around the (105) reflection for as-fabricated n-GaN epilayer. The inset shows its corresponding  $2\theta$ - $\omega$  scanning curve.
